# Supplementary material
Source: MDPI journal article supplement (https://www.mdpi.com/2297-8739/9/11/357)
Supplement: s1 [file s1]

Supplementary Materials

# A Neglected Issue: Stationary Phase Retention Determination of Classic High-Speed Counter-Current Chromatography Solvent Systems

Sha Li <sup>1,†</sup>, Tiandan Li <sup>1,†</sup>, Xiaochao Hu <sup>1</sup>, Yong Yang <sup>2,\*</sup>, Yangyi Huang <sup>1</sup> and Kai He <sup>1,\*</sup>

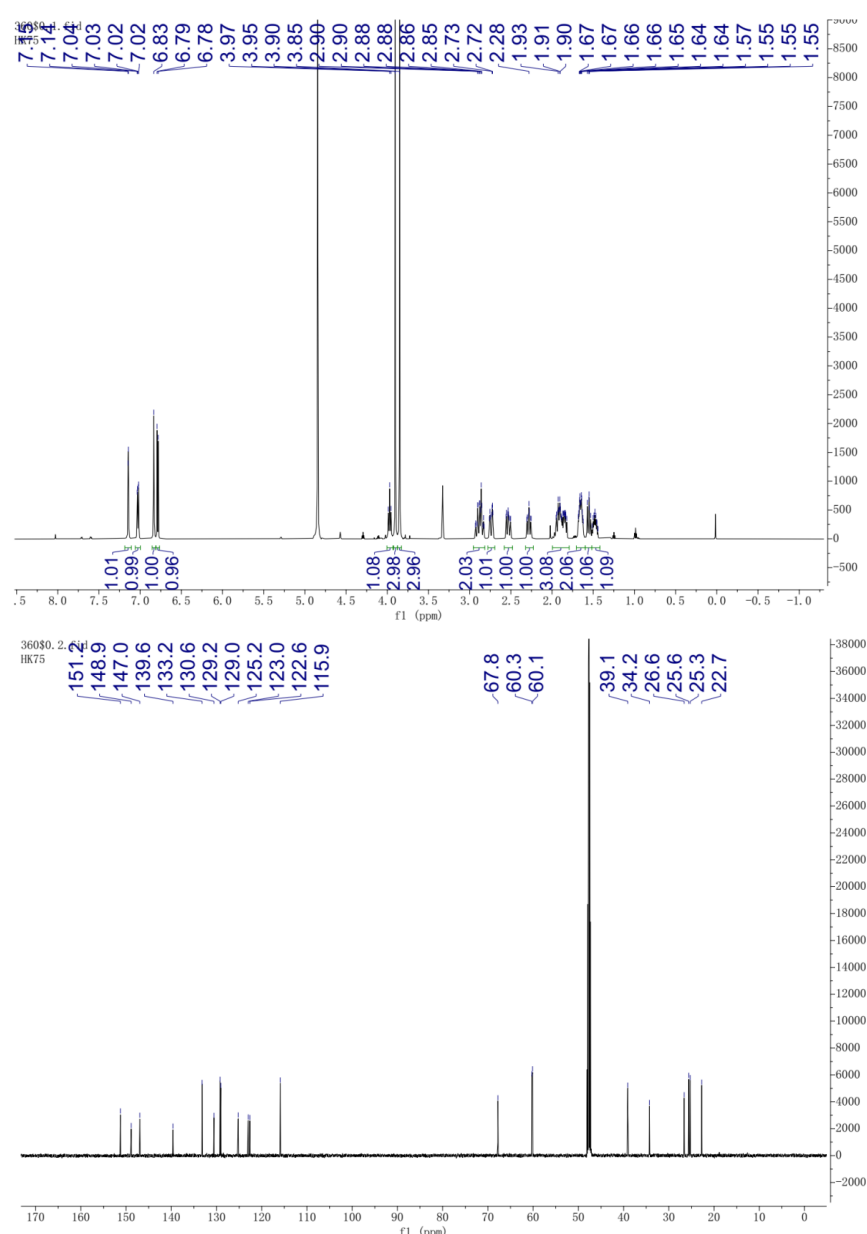

**Figure S1.** The <sup>1</sup>H and <sup>13</sup>C NMR spectroscopic data of myricanol.

<sup>1</sup>H NMR (CD<sub>3</sub>OD, 300 MHz): 2.53 (m, 1H), 2.74 (m, 1H), 1.91 (m, 2H), 1.55 (m, 1H), 1.65 (m, 1H), 1.48 (m, 1H), 1.85 (m, 1H), 3.97 (t, J = 9.8 Hz, 1H), 1.65 (m, 1H), 2.28 (m, 1H), 2.89 (m, 2H), 7.03 (dd, J = 8.2, 2.3 Hz, 1H), 6.79 (d, J = 8.2 Hz, 1H), 7.14 (d, J = 2.3 Hz, 1H), 6.83 (s, 1H), 3.85 (s, 3H), 3.90 (s, 3H). <sup>13</sup>C NMR (CD<sub>3</sub>OD, 300 MHz): 123.0 (C-1), 122.6 (C-2), 148.9 (C-

---

3),139.6 (C-4),147.0 (C-5),125.2 (C-6),34.2 (C-7),22.7 (C-8),25.3, (C-9),25.6 (C-10),67.8 (C-11),26.6 (C-12),39.1 (C-13),130.6 (C-14),129.2 (C-15),115.9 (C-16),151.2 (C-17),133.2 (C-18),129.0 (C-19),60.3 (C-20),60.1 (C-21).
